# Supplementary material for: Real time optical detection of gold in living cells through genetically-encoded probe
Source: Royal Society of Chemistry journal article supplement (doi:10.1039/d2ra02574d), 2022-01-01
Supplement: d2ra02574d1.pdf [file d2ra02574d1.pdf]

1       **Real time optical detection of gold in living cells through genetically-encoded probe**

2                                  Rahila Nazir<sup>1,2</sup>, Mohd Mohsin<sup>1\*</sup> and Tariq Omar Siddiqi<sup>2</sup>

3       1. Metabolic engineering Lab, Department of Biosciences, Jamia Millia Islamia, New Delhi,  
4                                  INDIA

5       2. Molecular Ecology Laboratory, Department of Botany, Jamia Hamdard, New Delhi,  
6                                  INDIA

7

8

9

10

11

12 \*Corresponding author: Mohd Mohsin ([mmohsin1@jmi.ac.in](mailto:mmohsin1@jmi.ac.in)).

13 Metabolic Engineering Laboratory, Department of Biosciences,

14 Jamia Millia Islamia (A central university), New Delhi-110025, INDIA

15 Phone no. +91-(11)26981717

16 Fax: +91(11)2698 0229

17

18

19

20

21

22

23 **FIG. S1.**The BLAST result of GolB gene. The subject is the result of the sequencing, whereas  
 24 the query is the original sequence.

| Score         | Expect                                                        | Identities    | Gaps      | Strand    |
|---------------|---------------------------------------------------------------|---------------|-----------|-----------|
| 361 bits(195) | 6e-105                                                        | 195/195(100%) | 0/195(0%) | Plus/Plus |
| Query 1       | GGTATGCAGTTCACATCGACGATATGACCTGCGGTGGCTGCGCGAGCACCGTGAAGAAA   | 60            |           |           |
| Sbjct 1       | GGTATGCAGTTCACATCGACGATATGACCTGCGGTGGCTGCGCGAGCACCGTGAAGAAA   | 60            |           |           |
| Query 61      | ACCATTCTGACCCTGGACGCGAACGCGACCGTTTCGTACCGACCCGGCGACCCGTCTGGTG | 120           |           |           |
| Sbjct 61      | ACCATTCTGACCCTGGACGCGAACGCGACCGTTTCGTACCGACCCGGCGACCCGTCTGGTG | 120           |           |           |
| Query 121     | GATGTTGAGACCAGCCTGAGCGCGGAACAGATTGCTGCGGCGCTGCAAAAGGCGGGTTTT  | 180           |           |           |
| Sbjct 121     | GATGTTGAGACCAGCCTGAGCGCGGAACAGATTGCTGCGGCGCTGCAAAAGGCGGGTTTT  | 180           |           |           |
| Query 181     | CCGCCGCGTGAGCGT                                               | 195           |           |           |
| Sbjct 181     | CCGCCGCGTGAGCGT                                               | 195           |           |           |

25

26 **FIG. S2.**SDS-PAGE profile of the sensor protein. M: Marker, S: Sample.

27

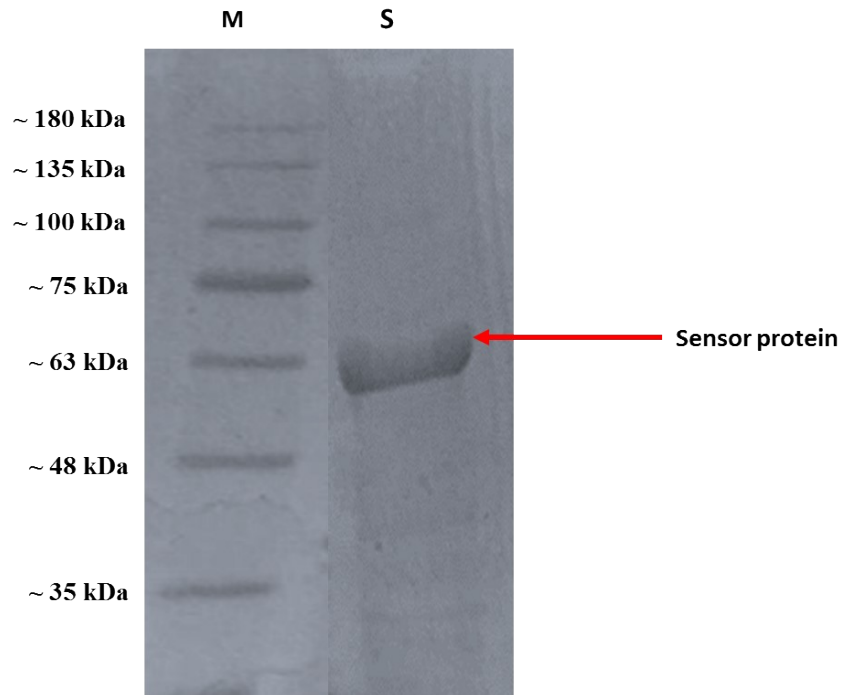

28

29

30

31 **FIG. S3.**Confocal image of bacterial cells demonstrating effective expression of AuSEN-25,  
32 which is genetically encoded.

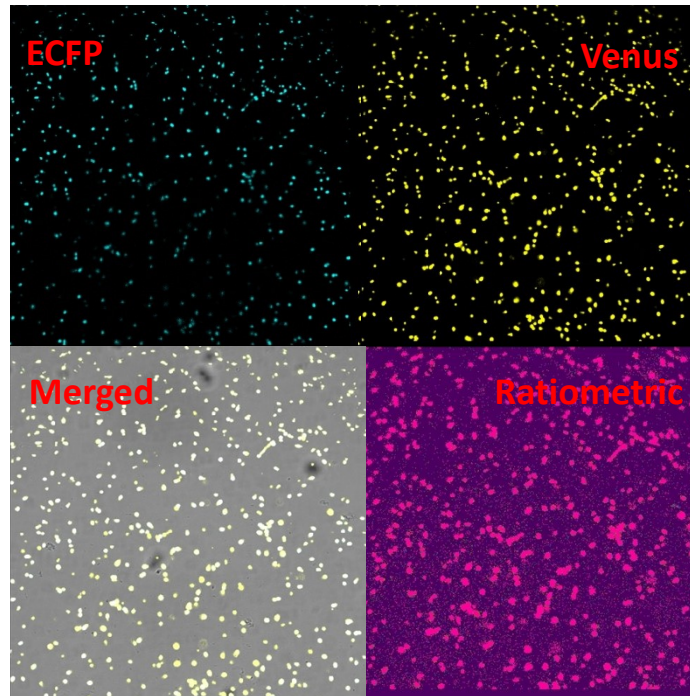

33

34 **FIG. S4.**Confocal image of yeast cells expressing AuSEN-25.

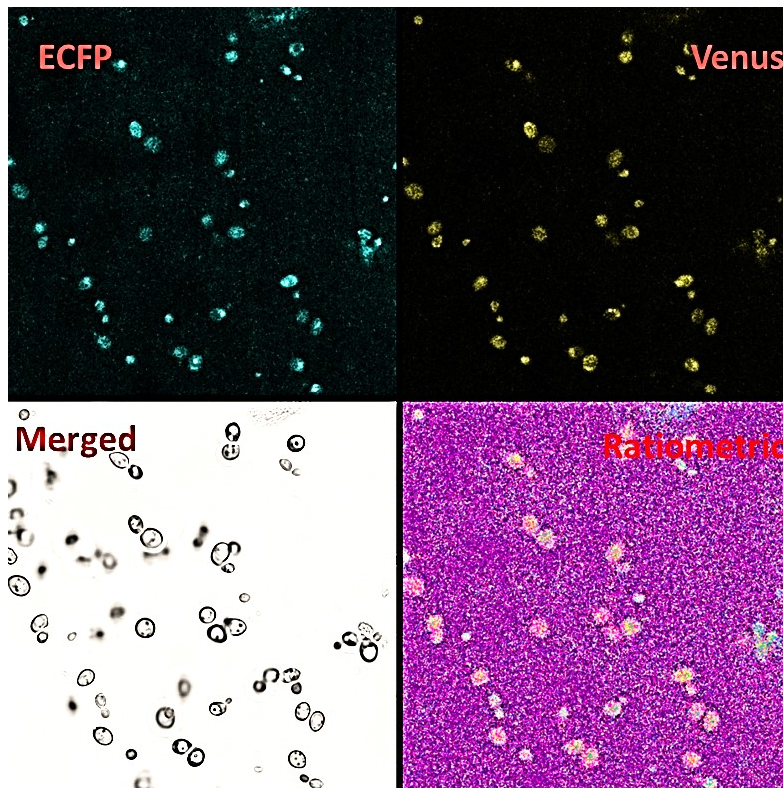

35
